# Supplementary material for: Bimanual Movement Characteristics and Real-World Performance Following Hand–Arm Bimanual Intensive Therapy in Children with Unilateral Cerebral Palsy
Source: MDPI journal article supplement (doi:10.3390/bs13080681), 2023-08-13
Supplement: s1 [file s1]

### Supplementary Material 1: Activities included in the HABIT protocol

| Activity Category             | Goal                                                                                                                                                                        | Activities and games                                                                                                                                                                                                                                                                                                                                  | Time                              | Type of involved hand use                                                                                                                                             | Parameters manipulated                                                       |
|-------------------------------|-----------------------------------------------------------------------------------------------------------------------------------------------------------------------------|-------------------------------------------------------------------------------------------------------------------------------------------------------------------------------------------------------------------------------------------------------------------------------------------------------------------------------------------------------|-----------------------------------|-----------------------------------------------------------------------------------------------------------------------------------------------------------------------|------------------------------------------------------------------------------|
| <b>Gross motor activities</b> | Repetitive task practice that involves shoulder, elbow, wrist, and hand activities in a functional context                                                                  | Basketball, baseball, fishing, bowling, magnetic builders, badminton with air balloon, screwing nuts and bolts, Velcro tennis paddle, catch and throw, dart game with Velcro ball, ring toss, play dough / putti, activities in a play sand, construction toys                                                                                        | 15 - 20 minutes for each activity | Stabilizer, manipulator, active/passive assist, symmetrical or asymmetrical movements, gross motor grasp, gross movements of the upper extremity                      | Spatial and temporal components, frequency, accuracy, the assisting hand use |
| <b>Fine motor activities</b>  | Repetitive task practice for precision activities that involve fine motor grasps, in- hand manipulation, hand opening, release and finger isolation activities              | Card games (flipping), opening and closing a lid of jar/bottle, paper tearing and tracing, beads and strings, keyboard activities, finger aerobics, scissor skills, sticks and beads, geometric ring set stacking, magnetic building sticks and blocks, Jenga, magnetic tiles, drawing, paper bag puppets, paper plate crafts, connect 4, LCD tablet. | 15 - 20 minutes for each activity | Stabilizer, manipulator, active/passive assist, symmetrical or asymmetrical movements, reach, lift, grasp, release, finger isolation, supination, and pronation grasp | Spatial and temporal components, frequency, accuracy, the assisting hand use |
| <b>Strength activities</b>    | Repetitive task practice for pinch and grasp activities that require hook, spherical, cylindrical grasps, tip to tip and pulp to pulp pinches (2 - 3 chuck) and prehensions | Squeezers, textured pull and stretch balls, suction toys, pulling balls from Velcro tennis paddle, Tug of war game, pull tubes, Thera putti, passing a football with both hands, weight cuffs, dumbbells, weighted bars.                                                                                                                              | 15 - 20 minutes for each activity | Stabilizer, manipulator, active/passive assist, symmetrical or asymmetrical movements, reach, grips, fingertip forces.                                                | Spatial and temporal components, frequency, accuracy, the assisting hand use |

| Activity category            | Goal                                                                                                                                               | Activities and Games                                                                                                                                                                                                                                                                                                                                                                    | Time            | Type of involved hand use                                                                                                                                             | Parameters manipulated                                                       |
|------------------------------|----------------------------------------------------------------------------------------------------------------------------------------------------|-----------------------------------------------------------------------------------------------------------------------------------------------------------------------------------------------------------------------------------------------------------------------------------------------------------------------------------------------------------------------------------------|-----------------|-----------------------------------------------------------------------------------------------------------------------------------------------------------------------|------------------------------------------------------------------------------|
| <b>Functional activities</b> | To train the child on functional activities that require bimanual coordination                                                                     | Tying shoelaces, making a tie, kneading a cake and cookie dough, zipping jacket, buttoning a shirt, using a fork and knife, chopping vegetables, don and doff jacket, removing lids of different sized containers, folding clothes, opening doorknob, using lock and key, assembling nuts and bolts, fastening paperclips, swinging tennis and badminton rackets, swinging baseball bat | 20 minutes      | Stabilizer, manipulator, active/passive assist, symmetrical or asymmetrical movements, reach, lift, grasp, release, finger isolation, supination, and pronation grasp | Spatial and temporal components, frequency, accuracy, the assisting hand use |
| <b>Group activities</b>      | Warm up, increase the interests of children, encourage bilateral use in play/ sport related tasks, to bring out competitive spirit and performance | Parachute, noodle hockey, hungry hippo, prone scooter race, Lego building competition, passing the football                                                                                                                                                                                                                                                                             | 30 minutes/ day | Upper extremity movements                                                                                                                                             |                                                                              |
